1 **Title: Variations of intracellular density during the cell cycle arise from tip-growth**  
2 **regulation in fission yeast**

3  
4 *Short title: Density variations during the fission yeast cell cycle*

5  
6 Authors: Pascal D. Odermatt<sup>1,2</sup>, Emrah Bostan<sup>3</sup>, Kerwyn Casey Huang<sup>2,4,5,\*</sup>, Fred Chang<sup>1,\*</sup>

7  
8 <sup>1</sup>Department of Cell and Tissue Biology, University of California, San Francisco, San Francisco, CA  
9 94143, USA

10 <sup>2</sup>Department of Bioengineering, Stanford University, Stanford, CA 94305, USA

11 <sup>3</sup>Informatics Institute, University of Amsterdam, Amsterdam, Netherlands

12 <sup>4</sup>Department of Microbiology and Immunology, Stanford University School of Medicine, Stanford,  
13 CA 94305, USA

14 <sup>5</sup>Chan Zuckerberg Biohub, San Francisco, CA 94158

15  
16 \*Contact: [kchuang@stanford.edu](mailto:kchuang@stanford.edu) and [fred.chang@ucsf.edu](mailto:fred.chang@ucsf.edu)

17  
18 Keywords: quantitative phase imaging, fission yeast, *Schizosaccharomyces pombe*, dry-mass  
19 density, cell-cycle arrest, cytokinesis, mitosis

20 **Abstract**

21

22 Intracellular density is a critical parameter that impacts the physical nature of the cytoplasm and  
23 has the potential to globally affect cellular processes. How density is regulated during cell growth  
24 is poorly understood. Here, using a new quantitative phase imaging method, we show that dry-  
25 mass density varies during the cell cycle in the fission yeast *Schizosaccharomyces pombe*. Density  
26 decreased during G2 phase, increased in mitosis and cytokinesis, and rapidly dropped at cell  
27 birth. These density variations can be explained mostly by a constant rate of biomass synthesis  
28 throughout the cell cycle, coupled to slowdown of volume growth during mitosis and cytokinesis  
29 and rapid expansion post-cytokinesis. Arrest at specific cell-cycle stages led to continued  
30 increases or decreases in density. Spatially heterogeneous patterns of density suggested a link  
31 between tip growth and density regulation. Density differences between daughter cells in cells  
32 delayed in cytokinesis resulted in bending of the septum away from the high-density daughter,  
33 suggesting that intracellular density correlates with turgor pressure. Our results demonstrate  
34 that the systematic variations in density during the cell cycle are determined predominantly by  
35 modulation of volume expansion, and reveal functional consequences of intracellular density  
36 gradients.

## 37 **Introduction**

38 Intracellular density, a cumulative measure of the concentrations of all cellular components, is an  
39 important parameter that globally affects cellular function. Density affects the concentration and  
40 activities of biomolecules, and can impact biophysical properties of the cytoplasm such as  
41 macromolecular crowding, diffusion, mechanical stiffness, and phase transitions<sup>1-4</sup>. Although it is  
42 often assumed that density must be maintained at a particular level to optimize fitness, there is a  
43 growing appreciation that density often varies across physiological conditions. Substantial shifts  
44 in density and/or crowding have been demonstrated in development, aging, and disease states<sup>3</sup>.  
45 Even normal cell-cycle progression can involve changes in density; in cultured mammalian cells,  
46 volume increases by 10-30% during mitosis<sup>5,6</sup>, which likely dilutes the cytoplasm prior to an  
47 increase in density during cytokinesis.

48

49 The homeostatic mechanisms maintaining cellular density remain poorly understood. Over the  
50 course of a typical cell cycle, cells both double their volume and duplicate all cellular contents. A  
51 critical unresolved question is how volume growth and biosynthesis are coordinated. In walled  
52 cells, the rate of volume growth is dictated largely by cell-wall synthesis and turgor pressure<sup>7</sup>. In  
53 principle, feedback mechanisms could exist that tightly couple biosynthesis with wall expansion.  
54 However, recent studies demonstrated that it is possible to decouple biosynthesis and volume  
55 growth. For instance, budding yeast cells that are arrested in G1 phase grow to very large sizes  
56 and exhibit dilution of the cytoplasm accompanied by decreased protein synthesis and growth  
57 rate<sup>8</sup>. Conversely, inhibition of volume growth in fission yeast using osmotic oscillations or  
58 inhibition of secretion leads to increased density accompanied by a subsequent dramatic  
59 increase in volume growth rate<sup>9</sup>.

60

61 Numerous methods have been developed to measure aspects of biomass and intracellular  
62 density and crowding in living cells<sup>10</sup>. Suspended microchannel resonators (SMR) infer buoyant  
63 cell mass from changes in the frequency of a resonating cantilever as a single cell passes through  
64 an embedded microchannel<sup>11</sup>. Quantitative phase imaging (QPI) is a well-established optical  
65 technique for extracting dry-mass measurements from changes in the refractive index<sup>12</sup>. The  
66 interpretation of phase shifts depends on the similarity in the refractive indices of major cellular  
67 components such as proteins, lipids, and nucleic acids<sup>10</sup>. Previous studies have used phase  
68 gratings or holography to generate phase-shift maps that can be used to quantify intracellular  
69 density; these approaches require specialized equipment<sup>13</sup>.

70

71 Here, we develop a new QPI method for measuring the intracellular density of fission yeast cells.  
72 This label-free method is based on the analysis of z-stacks of brightfield images<sup>14</sup>, thus having the  
73 advantage of not requiring a specialized phase objective or holographic system. Fission yeast is a  
74 leading cell-cycle model, as cells have a highly regular rod-like shape, size, and cell cycle  
75 conducive to quantitative analyses. Using QPI, we show that wild-type fission yeast cells exhibit  
76 characteristic density changes during the cell cycle, in which density falls during G2 phase and  
77 increases during mitosis and cytokinesis. These density variations can be explained by variations  
78 in volume growth while mass grows exponentially throughout the cell cycle, and perturbations  
79 to cell-cycle progression and/or growth has predictable effects on density. We further describe  
80 intracellular density gradients and a correlation of intracellular density with osmotic pressure  
81 and envelope mechanics. Our findings illustrate a general mechanism of density regulation  
82 through adjusting the relative rates of volume growth and biosynthesis.

## 83 **Results**

84

### 85 **Quantitative phase imaging enables high-resolution measurements of intracellular** 86 **density in growing cells**

87 To measure intracellular density using a standard wide-field microscope, we developed a version  
88 of QPI in which the phase shift is retrieved computationally from a z-stack of brightfield  
89 images<sup>14</sup>. This label-free approach takes advantage of the linear relationship between the  
90 intracellular concentration of biomolecules and the refractive index of the cell interior, which can  
91 be computed from the light intensity profile along the z-direction using the transport-of-intensity  
92 equation (Figure 1A, Methods). To calibrate phase shifts with absolute concentrations (dry-  
93 mass/volume), we measured the phase shifts within cells in media containing a range of  
94 concentrations of bovine serum albumin (BSA) (Methods) and confirmed a linear relationship  
95 that can be used to extrapolate the density of cells (Figure 1B). This method provides pixel-scale  
96 measurements of density in living cells, and can easily be applied during time-lapse imaging with  
97 sub-minute time resolution on most wide-field microscopes. Using this methodology, the mean  
98 intracellular density of an asynchronous population of *S. pombe* cells growing at 30 °C in rich  
99 YE5S medium was  $282 \pm 16$  mg/mL (Figure 1C). The distribution was remarkably narrow, with  
100 coefficient of variation of 0.06, despite variability in cell size, cell-cycle stage, and the various  
101 sources of intracellular heterogeneities such as lipid droplets (Figure S1) and cell wall septa  
102 (both of which were regions of high signal). The nucleus was not apparent in most phase-shift  
103 maps, indicating similar density as the cytoplasm (Figure 1A). A similar distribution of densities  
104 was observed in cells grown at 25 °C and after temperature shifts (Figure 1D). These results  
105 suggest that dry-mass density is robustly maintained, and demonstrate that this QPI approach

106 can precisely measure absolute dry-mass density in living cells with high temporal and spatial  
107 resolution.

108

### 109 **Intracellular density follows a characteristic trajectory during the cell cycle**

110 To determine whether intracellular density changes over the course of the cell cycle, we imaged  
111 proliferating cells in time-lapse using QPI in a microfluidic device under constant flow of growth  
112 medium (Methods) (Figure 2A, Movie S1). Density maps were segmented to extract cellular  
113 dimensions, from which volume was computed (Figure 1A) (Methods). Total dry mass of each  
114 cell was computed from volume and mean density measurements. We imaged cells throughout  
115 their entire cell cycle, and then aligned the computed data from each cell by relative cell-cycle  
116 progression, from cell birth (first detectable physical separation between daughter cells) until  
117 just before cell-cell separation at the end of the cell cycle. As observed previously<sup>15</sup>, cells  
118 exhibited steady tip growth in interphase (mostly G2 phase), and then volume growth slowed or  
119 halted during mitosis and cytokinesis (defined here as the period starting from septum  
120 formation and ending at daughter-cell separation) (Figure 2B).

121

122 Intracellular density displayed consistent dynamics during the cell cycle. Density gradually  
123 decreased from the beginning of the cell cycle through G2 phase by ~5%, followed by a steady  
124 rise in mitosis and cytokinesis (Figure 2C). We confirmed these findings using a complementary  
125 approach for measuring density. Holographic imaging (Methods) showed that the mean  
126 refractive index of cells decreased with cell length prior to septation, whereas cells of similar  
127 length with a septum exhibited higher refractive indices (Figure S3A,B)<sup>16</sup>.

128

129 At the end of cytokinesis, the middle layer of the septum is digested and daughter cells separate.  
130 During this 5-10-min period, the septum bulges outward on each side to form the rounded new  
131 pole in a physical process driven by turgor pressure<sup>17</sup>. Analysis of individual cells showed a  
132 consistent drop in density within a 5-min window around cell separation (Figure 2E, S4A,B);  
133 during this period, cell volume suddenly increased by ~5% while density decreased by ~5%  
134 (Figure 2E). Thus, density appears to be directly tied to the dynamics of volume expansion.

135

136 Our precision measurements of cellular dimensions and intracellular density provide a  
137 quantitative characterization of dry-mass dynamics (biosynthesis) throughout the cell cycle. The  
138 absolute rate of dry-mass accumulation steadily increased during the cell cycle (Figure 2D), and  
139 dry-mass dynamics were more exponential than linear in nature (Figure 2F, Figure S2A). The  
140 absolute rate of mass synthesis was therefore higher during mitosis and cytokinesis than at the  
141 beginning of the cell cycle, even though the cell slowed in volume growth late in the cycle. Thus,  
142 mass production was not tightly coupled to volume growth. These measurements suggest a  
143 simple model in which the increase of density in mitosis and cytokinesis arises as consequence of  
144 continued mass accumulation when volume growth is halted (Figure 2F).

145

#### 146 **Cell-cycle perturbations exacerbate cell cycle-dependent density variation**

147 Our data demonstrate that intracellular density increases during mitosis and cytokinesis because  
148 biosynthesis continues unabated while volume growth slows down; conversely, density  
149 decreases during interphase because the rate of volume growth surpasses the rate of mass  
150 synthesis. One possibility is that the relative rate of mass synthesis is not directly coupled to cell-  
151 cycle stage-specific volume growth rates, but rather determined by environmental factors;  
152 density variations then arise simply as a consequence of cell-cycle regulation of volume

153 expansion, which is controlled by cell polarity programs that redirect the cell envelope growth  
154 machinery to the middle of the cell for septum formation prior to cytokinesis<sup>18-20</sup>. Alternatively,  
155 the density at each cell-cycle stage could be directly programmed to specific levels by specific  
156 cell-cycle regulators. To distinguish these models, we examined the consequences of arresting or  
157 delaying cells at particular stages of the cell cycle (Figure 3A). If there is no strict control of  
158 biosynthesis, then when mitosis or cytokinesis is blocked, mass should continue to accumulate  
159 and density should reach higher levels than in normal cells, and conversely density should fall  
160 below normal in extended interphase. If density is instead set at specific levels according to cell-  
161 cycle phase, density levels should not change during cell-cycle delays beyond the ranges  
162 appropriate for each phase.

163

164 First, we tested whether density would decrease further in cells with an extended period of  
165 growth during interphase. We delayed cells in G2 phase using a *cdc25-22* mutant<sup>21</sup> by shifting  
166 them from room temperature to the semi-permissive temperature (32 °C) (Figure 3B,C). These  
167 cells continued to grow from their tips and formed abnormally elongated cells. To focus on cells  
168 that remained in G2 for an extended interval, we limited our analysis to cells that elongated to  
169 >2.5-fold their initial length. In these cells, during their prolonged G2 phase of 2-3 h, density  
170 decreased further than in wild-type cells (~8% in *cdc25-22* cells from 267±19 to 245±6 mg/mL,  
171 compared to ~5% in wild-type cells from 267±11 to 250±6 mg/mL) (Figure 3C). These data  
172 suggest that density falls during G2 phase because the rate of volume growth continues to be  
173 slightly faster than the rate of biosynthesis.

174

175 Second, we tested whether cells arrested in mitosis would increase in density (Figure 4A). We  
176 delayed cells in metaphase using a *cut7-ts* mutant (kinesin-5) defective in mitotic spindle



177 assembly<sup>22</sup>. We tracked intracellular density from mitosis initiation until the earliest signs of  
178 septum formation. As expected, at the non-permissive temperature this interval was longer for  
179 *cut7-ts* cells (20-30 min) compared with 10-20 min in wild-type cells (Figure 4B,C). During this  
180 mitotic period, the density of wild-type and *cut7-ts* cells increased at a similar rate, hence the  
181 extended time in metaphase in *cut7-ts* cells led to a greater density increase (7% in *cut7-ts* from  
182 270±12 to 288±14 mg/mL versus 5% in wild-type cells from 264±11 to 278±13 mg/mL).

183

184 Third, we arrested cells in cytokinesis, again to test for an increase in density (Figure 4A). *cdc16-*  
185 *116* mutant cells do not separate, and hence proceed to repeatedly make septa without  
186 elongating<sup>23</sup>. Upon a shift from 25 °C to the non-permissive temperature (34 °C), cells that  
187 maintained a cytokinetic arrest continued to increase in cytoplasmic density; density after 90  
188 min was 20-30% higher than in cytokinesis-competent wild-type cells (Figure 4D,E). Thus,  
189 biosynthesis continues throughout an extended block of mitosis or cytokinesis, leading to  
190 abnormally high intracellular density.

191

192 Finally, we asked whether inhibition of volume growth is sufficient to increase cytoplasmic  
193 density. We previously showed that two treatments that slow down volume growth (osmotic  
194 oscillations and treatment with brefeldin A) lead to an increase in cytoplasmic density<sup>9</sup>.  
195 However, since these treatments do not completely halt volume growth and/or result in cell  
196 death, we treated cells with the F-actin inhibitor latrunculin A, which causes immediate cessation  
197 of tip growth independent of cell-cycle stage<sup>24,25</sup>. All latrunculin A-treated cells completely halted  
198 tip growth and began to steadily increase in density, regardless of their cell-cycle stage (Figure  
199 6A). The mean density increase after 1 h was ~20% (Figure 6B). Similar increases were seen in  
200 cells of different sizes (Figure S5). However, we noted that in contrast to the mitotic and

201 cytokinesis arrests, mass increases were variable and on average increased more slowly during  
202 latrunculin A treatment than during normal growth (Figure S5, Figure 6A), suggesting a partial  
203 slowdown in biosynthesis or increase in degradation.

204

205 These results indicate that density levels are not coupled to specific cell cycle stages but are  
206 sensitive to the regulation of volume growth, and inhibition of volume growth is sufficient to  
207 increase intracellular density.

208

### 209 **A polarized density gradient is associated with the pattern of tip growth**

210 Fission yeast have a well-known pattern of growth in which after cell division, the old end grows  
211 initially, until part-way through G2 phase the new end begins to grow, at a slower rate than the  
212 old end<sup>15</sup>. As expected, our time-lapse data showed that the old and new ends grew on average  
213 by  $\sim 4$  and  $2 \mu\text{m}$ , respectively, during the cell cycle. We noted that many cells exhibited a gradient  
214 of intracellular density in which the ends that were actively growing appeared less dense than  
215 the non-growing ends (Figure 6A). We hypothesized that these subcellular gradients reflected  
216 differences in tip growth between the two ends of the cell. In agreement with our hypothesis, the  
217 slower-growing new end typically appeared more dense than the faster-growing end. In some  
218 cells, the difference in densities between the fast- and slow-growing ends was  $\sim 10\%$  of the mean  
219 overall density (Figure 6A). The mean density difference between the two ends throughout the  
220 cell cycle was  $\sim 15 \text{ mg/mL}$ , corresponding to  $\sim 5\%$  of the mean overall density (Figure 6B). To  
221 address the potential for differences in the widths (and hence heights above the coverslip) of old  
222 and new ends to influence phase shifts, we constrained our analysis to cells within a narrow  
223 range of widths and found that local density and tip growth remained highly correlated (Figure  
224 S6A,B). Moreover, in cells treated with latrunculin A to inhibit growth, spatial density gradients

225 persisted over time (Figure S6C). These results demonstrate that intracellular density is linked to  
226 local growth patterns.

227

228 Daughter cells directly after cytokinesis often exhibited differences in intracellular density. Time-  
229 lapse imaging showed that the intracellular density differences established during interphase  
230 were often propagated through cell division and correlated with density differences between the  
231 progeny daughter cells after cytokinesis (Figure 6D,E). Thus, subcellular density variations are  
232 sufficiently stable to be propagated through generations.

233

#### 234 **Cell density differences impact septum shape through correlation with turgor pressure**

235 Next, we ascertained whether density differences of the magnitude seen within and across cells  
236 with normal physiology (5-20%) have physiological consequences. One possible effect of  
237 intracellular density is macromolecular crowding. High concentrations of macromolecules are  
238 predicted to produce colloid osmotic pressure that may influence cell mechanics<sup>2</sup>. Consistent  
239 with the presence of intracellular gradients in non-septated cells, we observed in septated cells  
240 that the densities of daughter compartments were often different (particularly those with  
241 delayed cell separation such as *mid1*, *mid2*, and *cdc16* cells), and that the septum between these  
242 daughter cells bent away from the more dense compartment (Figure S7). Previous studies  
243 showed that the septum is an elastic structure that can be used as a biosensor that informs on  
244 osmotic pressure differences between the compartments. For instance, when one daughter is  
245 lysed by laser microsurgery and loses turgor pressure, the septum bulges away from the intact  
246 daughter<sup>17</sup>. Temporal fluctuations in septum bending thus suggest that the pressure difference  
247 between daughter cells alternates in sign<sup>26</sup>.

248

249 To investigate the relationship between density differences and septum bending, we focused on  
250 *mid2Δ* cells. Mid2 is an anillin orthologue that regulates septins in late cytokinesis; *mid2Δ*  
251 mutants exhibit long delays (1-2 h) in cell separation and thus most cells in the population have  
252 one or more septa<sup>27</sup>. We used QPI imaging to track density over time, and identified the time  
253 after septum formation at which the maximum density difference was reached for each cell. 71%  
254 (64/90) of cells exhibited a bent septum, and of these cells 97% (62/64) exhibited a septum bent  
255 away from the compartment of higher density at the time of maximum density difference (Figure  
256 7A), with a mean maximum difference of  $16 \pm 5\%$  (Figure 7B). In two cases (2/90), the septum  
257 was bent in the opposite manner toward the compartment of lower density. In these cells the  
258 maximum density difference was substantially lower (5%; Figure 7B), and may represent septa  
259 that fluctuated in direction. Indeed, in one cell the fluctuating direction of septum bending  
260 correlated with alternation of the sign of the density difference between the daughter cells  
261 (Figure 7C). In instances where the septum appeared flat, the density difference was significantly  
262 lower ( $\sim 4.5\%$ ) than in cells with a bent septum.

263

264 We also noted density variations and bent septa in multi-septated *mid2Δ* cells. In particular,  
265 internal compartments bounded by two septa were hampered in their ability to grow in volume  
266 and correspondingly exhibited higher density than the surrounding compartments. These  
267 situations were frequently associated with both septa bending away from the higher-density  
268 compartment (Figure S7C). The observation that septal bending occurred for density differences  
269 as low as 5-10% suggests that the density variations over the course of a normal cell cycle  
270 (Figure 2) or between growing and non-growing cell tips (Figure 6) may reflect substantial  
271 changes in turgor-mediated stresses.

## 272 **Discussion**

273 Here, we establish a QPI method based on z-stacks of brightfield images for quantifying  
274 intracellular density dynamics without specialized equipment. We show that exponential-phase  
275 fission yeast cells have a dry mass density of  $282 \pm 16$  mg/mL, comparable to measurements in  
276 other organisms<sup>3,28</sup>. Density varied systematically across the cell cycle in wild-type fission yeast  
277 cells over a range of  $\sim 10\%$ , while the relative rate of dry-mass synthesis remained constant  
278 (reflecting exponential accumulation) throughout all cell-cycle stages (Figure 2). These  
279 quantitative findings, which utilize precise sub-pixel measurements of cellular dimensions and  
280 automated analysis platforms, are consistent with more qualitative density studies of fission  
281 yeast using other methods<sup>16,29,30</sup>.

282

283 Our data support a model in which density variations are a product of programmed changes in  
284 volume growth accompanied by a constant relative rate of mass biosynthesis. As a result, volume  
285 growth and biosynthesis were not tightly coupled throughout the cell cycle. During tip growth in  
286 G2, density dropped steadily (Figure 2C), indicating that the rate of volume growth outpaces  
287 biosynthesis during interphase. Density steadily rose during mitosis and cytokinesis (Figure 2C),  
288 when volume growth ceases or slows down. After separation of daughter cells (cell birth),  
289 density dropped during the rapid increase in cell volume as the new cell poles expanded (Figure  
290 2E), possibly due to water influx. Despite these changes in growth rate and density, it is  
291 remarkable that even without tight feedback controls, cells maintained a relatively tight  
292 distribution of densities across the population (Figure 1C).

293

294 Consistent with this model, density shifts were exacerbated by perturbations of cell-cycle  
295 progression or of volume growth directly. *cdc25* mutants delayed at the G2/M transition

296 exhibited a steady decline in density as cells elongated abnormally, reminiscent of the  
297 cytoplasmic dilution observed in very enlarged budding yeast and senescent mammalian cells<sup>8</sup>.  
298 During mitotic arrest at the spindle checkpoint (*cut7*) or cytokinesis arrest through regulation of  
299 the SIN pathway (*cdc16*), volume growth was slowed but mass synthesis was unaffected,  
300 resulting in steady density increases. Inhibition of cell growth with latrunculin A caused a steady  
301 increase in density regardless of cell cycle stage. These findings suggest that any perturbation  
302 that affects cell-cycle progression or growth will necessarily alter density dynamics. Cell-cycle  
303 arrests are commonly used to synchronize cells, and are often triggered in response to stresses  
304 such as DNA damage. Our study demonstrates that such perturbations are not as innocuous as  
305 often thought; arrests not only affect cell-cycle progression and cell size, but also cause changes  
306 in intracellular density.

307

308 Our studies provide quantitative measurements of the mass dynamics of individual fission yeast  
309 cells throughout the cell cycle. We found that it continued without any apparent change,  
310 consistent with previous studies<sup>29,30</sup>. In fact, mass dynamics were exponential in nature,  
311 consistent with findings in other cell types<sup>31</sup>. Intriguingly, studies of density and growth in other  
312 cell types showed somewhat different cell-cycle patterns. In budding yeast, buoyant density is  
313 lowest in early G1 and rises in late G1 and S phase at the time of bud formation<sup>28</sup>. Moreover, cell-  
314 cycle arrests in S and M phase and latrunculin A treatment do not lead to increases in buoyant  
315 density, unlike our findings in fission yeast. In human cells, mass growth continues in early  
316 mitosis, but stops in metaphase and resumes in late cytokinesis, potentially with subtle  
317 oscillations<sup>32,33</sup>. Density is constant during much of the cell cycle, but decreases in mitosis (by  
318 0.5% in buoyant mass, equivalent to >10% decrease in dry-mass density) coincident with a 10-  
319 30% volume increase during mitotic rounding; density then slightly increases in cytokinesis<sup>5,6</sup>. In

320 the bacterium *Escherichia coli*, density varies somewhat from birth to division, but the ratio of  
321 surface area to mass is relatively constant, suggesting that biosynthesis is linked to surface area  
322 synthesis<sup>34</sup>. We found that in fission yeast, mass was also more closely coupled with surface area  
323 than volume, especially when including the surface area of both sides of the septum (Figure S2B-  
324 D), although mass continued to accumulate during latrunculin A treatment despite minimal (if  
325 any) surface area growth (Figure 5B). It remains to be seen what general rules of cell density  
326 regulation will emerge from comparisons across organisms.

327

328 Our findings also provide insight into the relationship between the rate of volume growth and  
329 subcellular density regulation. Fission yeast cells grow through tip growth, which involves the  
330 extension and assembly of new cell wall and plasma membrane, which are accomplished by a  
331 complex integration of the cell-polarity machinery, exocytosis, wall growth and mechanics, and  
332 turgor pressure. In addition to the global effect of volume growth on density, the intriguing  
333 polarization of density patterns (Figure 6) suggests that tip growth influences local intracellular  
334 density patterns more directly. Spatial gradients revealed that local density was correlated with  
335 tip growth (Figure 6C), with slow-growing ends having higher density. It is not yet clear what  
336 cellular components are responsible for this spatial pattern, and whether they are actively  
337 depleted at growing cell tips or concentrated at non-growing regions. The relevant components  
338 may be membrane-bound or membrane-less organelles; it is unlikely that they are soluble, freely  
339 diffusing particles, unless a diffusion barrier (perhaps the nucleus) exists. Polarized density  
340 patterns established in interphase were often propagated through cell division and appeared to  
341 be inherited by the daughter cells, resulting in density differences across a lineage. How these  
342 patterns may lead to asymmetrical behaviors in cell lineages remain to be explored.

343

344 Effects of intracellular density changes on cellular functions are only beginning to be  
345 appreciated. Density changes of 5-20%, which likely affect the concentration of most if not all  
346 cellular components in the cytoplasm, could have profound consequences for the biochemistry of  
347 cellular reactions and on macromolecular crowding. Here we revealed that density also effects  
348 cell mechanics. Intracellular osmotic pressure and density differences between daughter  
349 compartments were highly correlated, as evidenced by bending of the elastic septal cell wall.  
350 Macromolecular crowding is thought to produce colloid osmotic pressure, which has been  
351 proposed to influence nuclear size control<sup>2,35</sup>. Our data suggests that density-dependent colloid  
352 pressure differences globally affect fission yeast cells by changing the distribution of mechanical  
353 stresses within the cell wall.

354

355 Another possible consequence of intracellular density changes is regulation of volume expansion.  
356 In fission yeast, perturbations that increase density are accompanied by a subsequent dramatic  
357 increase in volume growth rate that persists for hours<sup>9</sup>. Such growth regulation may play an  
358 important role in density homeostasis. Taken together, we speculate that the increase of density  
359 at cell division both may provide mechanical force through increased turgor pressure to facilitate  
360 cell-cell separation and bulging of the cell wall<sup>17</sup>, and perhaps to accelerate tip growth in the  
361 newly born cell<sup>9</sup>. Future studies focusing on the effects of cell density on particular cellular  
362 processes will be needed to understand the full scope of these density changes.



## 363 **Methods**

364

### 365 **Strains and cell culturing**

366 **All strains used in this study are listed in Table S1.** In general, cultures were grown in 3 mL of  
367 YES medium at 30 °C on a rotating shaker overnight to an OD<sub>600</sub>~1, diluted to OD<sub>600</sub>~0.1, and  
368 incubated until OD<sub>600</sub>~0.3 for imaging. Temperature sensitive mutant *cdc25-22* cells (and wild-  
369 type control cells) were first grown at room temperature, and 90 min after imaging started  
370 temperature was increased to 32 °C. Temperature sensitive mutant *cdc16-116* cells (and wild-  
371 type control cells) were first grown at 25 °C, and then imaged on the microscope with the  
372 temperature controlled enclosure pre-heated to 34 °C. Temperature sensitive mutant *cut7-446*  
373 cells (and wild-type control cells) were first grown at 25 °C, then imaged on the microscope with  
374 the temperature controlled enclosure pre-heated to 30 °C.

375

### 376 **Single-cell imaging**

377 Images were acquired with a Ti-Eclipse inverted microscope (Nikon) equipped with a 680-nm  
378 bandpass filter (D680/30, Chroma Technology) in the illumination path with a 60X (NA: 1.4) DIC  
379 oil objective (Nikon). Before imaging, Koehler illumination was configured and the peak  
380 illumination intensity at 10-ms exposure time was set to the middle of the dynamic range of the  
381 Zyla sCMOS 4.2 camera (Andor Technology). mManager v. 1.41<sup>36</sup> was used to automate  
382 acquisition of z-stack brightfield images with a step size of 250 nm from ±3 μm around the focal  
383 plane (total of 25 imaging planes) to ensure substantial oversampling that facilitated correcting  
384 for potential drift in the z-direction over the course of each experiment at 5 or 10 min intervals  
385 at multiple x/y-positions.

386

## 387 **Microfluidics**

388 Cellasic microfluidic flow cell plates (Millipore, Y04C) controlled by a ONIX or ONIX2 (Millipore)  
389 microfluidic pump system were used for imaging. YES medium was loaded into all but one of the  
390 fluid reservoirs; the remaining well was loaded with 100 mg/mL bovine serum albumin (BSA)  
391 (Sigma Aldrich) solution in YES. Liquid was flowed from all 6 channels for at least 5 min at 5 psi  
392 (corresponding to 34.5 kPa), followed by 5 min of flow from YES-containing wells to wash out  
393 buffer and fill channels and imaging chambers. The plate was kept in a temperature-controlled  
394 enclosure (OkoLab) throughout loading. Cells were then transferred into the appropriate well  
395 and loaded into the microfluidic imaging chamber such that a small number of cells were initially  
396 trapped, and flow of YES was applied. To ensure full exchange of liquid in the chamber during  
397 imaging, flow channel was switched at least 40 s before images were acquired. Every ~2 h, BSA  
398 flow was activated during one time point of imaging to calibrate QPI measurements.

399

## 400 **Image analysis to retrieve phase shifts**

401 To reduce post-processing time, each z-stack was cropped to a square region containing the  
402 cell(s) of interest and a border of at least 40 pixels, and the focal plane was identified. This  
403 cropping was accomplished by first using FIJI to identify regions of interest (ROIs) within a  
404 thresholded standard deviation z-projection image of each brightfield z-stack. Using Matlab  
405 (Mathworks), images were cropped to the ROIs and the standard deviation of the pixels in each  
406 ROI was computed. The focal plane was defined based on the image in the stack with the lowest  
407 standard deviation. Three images above and three images below the focal plane separated by  
408 500 nm were used to quantify cytoplasmic density. Based on these images, the phase information  
409 was calculated using a custom Matlab script implementing a previously published algorithm<sup>14</sup>. In  
410 brief, this method relates the phase information of the cell to brightfield image intensity changes

411 along the z-direction. Equidistant, out-of-focus images above and below the focal plane are used  
412 to estimate intensity changes at various defocus distances. A phase-shift map is reconstructed in  
413 a non-linear, iterative fashion to solve the transport-of-intensity equation.

414

#### 415 **Cytoplasmic density quantification**

416 Using Matlab, images were background-corrected by fitting a Gaussian to the highest peak of the  
417 histogram (corresponding to the background pixels) of the phase-shift map, and shifting every  
418 pixel to shift the background peak to the intensity value corresponding to zero phase shift. These  
419 background-corrected phase-shift maps were converted into binary images using watershedding  
420 for cell segmentation; where necessary, binary images were corrected manually to ensure  
421 accurate segmentation. Binary images were segmented using Morphometrics<sup>37</sup> to generate  
422 subpixel-resolved cell outlines.

423

424 Each cell outline was skeletonized using custom Matlab code as follows. First, the closest-fitting  
425 rectangle around each cell was used to define the long axis of the cell. Perpendicular to the long  
426 axis, sectioning lines at 250-nm intervals and their intersection with the cell contour were  
427 computed. The centerline was then updated to run through the midpoint of each sectioning line  
428 between the two contour-intersection points. The slope of each sectioning line was then updated  
429 to be perpendicular to the slope of the centerline around the midpoint. Sectioning lines that  
430 crossed a neighboring line were removed. Cell volume and surface area were calculated by  
431 summing the volume or area of each section assuming rotational symmetry. Volume and area of  
432 the poles were calculated assuming a regular spherical cap.

433

434 To convert the mean intensity of the phase-shift within each cell into absolute concentration (in  
435 units of mg/mL), the mean of all cells across all time points was first calculated. Then, the  
436 decrease in phase shift induced by a prescribed concentration of BSA (typically 100 mg/mL) was  
437 defined as the difference between the mean of the phase shifts before and after the BSA imaging  
438 time point and the phase shift during the BSA time point. This difference in intensity established  
439 the calibration scaling between phase shift intensity and the concentration of BSA (Figure 1B).  
440 The cytoplasmic density of each cell was then calculated by dividing the mean phase shift of the  
441 cell by the aforementioned scaling factor. The mass of each cell was inferred from its mean  
442 density and volume.

443

#### 444 **BSA calibration**

445 Channel slides ( $\mu$ -Slide VI 0.4, ibidi) were coated with lectin (Sigma-Aldrich, L1395) (0.1 mg/mL  
446 in water) for ~5 min, washed with YES, and cells were added and incubated for ~5 min to allow  
447 for attachment. Loose cells were removed by washing with YES. Attached cells were first imaged  
448 in YES medium. BSA was then added to a final concentration of 200 mg/mL. Consecutively, YES  
449 was added to dilute BSA to the desired concentrations (150, 100, and 50 mg/mL), followed by  
450 washout of the BSA and imaging in YES.

451

#### 452 **BODIPY staining and imaging**

453 10  $\mu$ L aliquots of 100 mM BODIPY 493/503 (Thermo Fisher, D3922) in absolute ethanol were  
454 prepared. Ethanol was then evaporated in a desiccator under vacuum and dried aliquots stored  
455 at 4 °C for long term storage. Before use, an aliquot was redissolved in 10  $\mu$ L absolute ethanol  
456 and to cells in YES 1  $\mu$ L was added per cell density OD<sub>600</sub> of 0.1. The cell-dye mix was incubated  
457 protected from light for ~1 min at room. Cells were then pelleted at 2000 rpm for 1 min and

458 medium was exchanged with fresh YES. Cells were spotted onto agarose pads and imaged with  
459 an EM-CCD camera (Hamamatsu) through a spinning-disk confocal system (Yokogawa CSU-10)  
460 attached to one of the ports of the Ti-Eclipse inverted microscope with a 488 nm laser. In  
461 parallel, brightfield z-stack images were acquired for QPI analysis.

462

### 463 **Lineage tracking for time-lapse imaging datasets**

464 First, each cell present at the beginning of the experiment was linked to the closest cell in the  
465 next frame based on the distance between centers and the difference in their size (cross-sectional  
466 area). A cell was considered the same if the centers between consecutive time points was within  
467 20 px ( $\sim 2\mu\text{m}$ ) and the cross-sectional area was not smaller than 70% compared to the previous  
468 time point. This process was iterated to define the lineage until either requirement was violated  
469 (usually occurring during cell division), at which point a new lineage was initialized using the  
470 earliest unassigned cell. All lineages were visually inspected and corrected when necessary.

471

### 472 **Polar growth and density quantification**

473 To separately quantify the growth of the new and old pole, fiduciary markers such as birth scars  
474 on the cell outline were identified from which the distance to each pole at the beginning and end  
475 of the cell cycle was measured. The density of each polar region was calculated by extracting the  
476 peak of the histogram of density values in the region within  $3\mu\text{m}$  of the pole at each time point,  
477 and then calculating the mean over time points.

478

### 479 **Holographic refractive index measurements**

480 For refractive index measurements, wild-type cells grown at  $30\text{ }^\circ\text{C}$  were immobilized on a lectin-  
481 coated glass-bottom 35 mm diameter  $\mu$ -dish (ibidi). Holographic refractive index measurements

482 were acquired with a 3D Cell Explorer system (Nanolive) with a temperature-controlled  
483 enclosure set to 30 °C. First, sum images of z-stacks of three-dimensional refractive index maps  
484 were generated to retrieve cell outlines by watershedding. Cells oriented at an angle to the flat  
485 glass bottom dish were ignored. For each remaining cell, the mean refractive index was extracted  
486 from each image in the z-stack using Matlab and the highest value (assumed to correspond to the  
487 middle plane) was used for further analysis.

488

### 489 **Latrunculin A treatment**

490 Stock solutions were made by dissolving 100 µg latrunculin A (Abcam, ab144290) in DMSO  
491 (Sigma-Aldrich) to a concentration of 20 mM and stored at -20 °C in 1 µL aliquots. To prepare  
492 agarose pads, 1 µL of 20 mM latrunculin A or 1 µL of DMSO was mixed with 100 µL of YES  
493 medium containing 2% w/v agarose UltraPure agarose (Invitrogen Corporation, Carlsbad, CA,  
494 USA) kept in a water bath at ~70 °C. The mixture was pipetted onto a microscope glass slide and  
495 quickly covered with another slide to form flat agarose pads with thickness of ~2 mm. Once pads  
496 had solidified, one slide was carefully removed and 1-2 µL of exponential-phase wild-type cells  
497 were deposited on the agarose pad. Cells were allowed to settle for 1-2 min before a coverslip  
498 was placed on top and sides were sealed with Valap (1:1:1 vaseline:lanolin:paraffin) to prevent  
499 evaporation during imaging.

500

### 501 **Acknowledgements**

502 We thank the Chang and Huang labs for discussion and support, to Gabriella Estevam for  
503 contributions early in the project. P.D.O. was supported by postdoctoral fellowships from the  
504 Swiss National Science Foundation under Grants P2ELP3\_172318 & P400PB\_180872. F.C. was  
505 supported by NIH GM056836. K.C.H. is a Chan Zuckerberg Biohub investigator.

506 **References**

507

- 508 1 van den Berg, J., Boersma, A. J. & Poolman, B. Microorganisms maintain crowding  
509 homeostasis. *Nat Rev Microbiol* **15**, 309-318, doi:10.1038/nrmicro.2017.17 (2017).
- 510 2 Mitchison, T. J. Colloid osmotic parameterization and measurement of subcellular  
511 crowding. *Mol Biol Cell* **30**, 173-180, doi:10.1091/mbc.E18-09-0549 (2019).
- 512 3 Neurohr, G. E. & Amon, A. Relevance and Regulation of Cell Density. *Trends Cell Biol* **30**,  
513 213-225, doi:10.1016/j.tcb.2019.12.006 (2020).
- 514 4 Zhou, H. X., Rivas, G. & Minton, A. P. Macromolecular crowding and confinement:  
515 biochemical, biophysical, and potential physiological consequences. *Annu Rev Biophys* **37**,  
516 375-397, doi:10.1146/annurev.biophys.37.032807.125817 (2008).
- 517 5 Son, S. *et al.* Resonant microchannel volume and mass measurements show that  
518 suspended cells swell during mitosis. *J Cell Biol* **211**, 757-763,  
519 doi:10.1083/jcb.201505058 (2015).
- 520 6 Zlotek-Zlotkiewicz, E., Monnier, S., Cappello, G., Le Berre, M. & Piel, M. Optical volume and  
521 mass measurements show that mammalian cells swell during mitosis. *J Cell Biol* **211**, 765-  
522 774, doi:10.1083/jcb.201505056 (2015).
- 523 7 Rojas, E. R. & Huang, K. C. Regulation of microbial growth by turgor pressure. *Curr Opin*  
524 *Microbiol* **42**, 62-70, doi:10.1016/j.mib.2017.10.015 (2018).
- 525 8 Neurohr, G. E. *et al.* Excessive Cell Growth Causes Cytoplasm Dilution And Contributes to  
526 Senescence. *Cell* **176**, 1083-1097.e1018, doi:10.1016/j.cell.2019.01.018 (2019).
- 527 9 Knapp, B. D. *et al.* Decoupling of Rates of Protein Synthesis from Cell Expansion Leads to  
528 Supergrowth. *Cell Syst* **9**, 434-445.e436, doi:10.1016/j.cels.2019.10.001 (2019).
- 529 10 Zangle, T. A. & Teitell, M. A. Live-cell mass profiling: an emerging approach in quantitative  
530 biophysics. *Nat Methods* **11**, 1221-1228, doi:10.1038/nmeth.3175 (2014).
- 531 11 Burg, T. P. *et al.* Weighing of biomolecules, single cells and single nanoparticles in fluid.  
532 *Nature* **446**, 1066-1069, doi:10.1038/nature05741 (2007).
- 533 12 Park, Y., Depeursinge, C. & Popescu, G. Quantitative phase imaging in biomedicine. *Nature*  
534 *Photonics* **12**, 578-589, doi:10.1038/s41566-018-0253-x (2018).
- 535 13 Lee, K. *et al.* Quantitative phase imaging techniques for the study of cell pathophysiology:  
536 from principles to applications. *Sensors (Basel, Switzerland)* **13**, 4170-4191,  
537 doi:10.3390/s130404170 (2013).
- 538 14 Bostan, E., Froustey, E., Nilchian, M., Sage, D. & Unser, M. Variational Phase Imaging Using  
539 the Transport-of-Intensity Equation. *IEEE Trans Image Process* **25**, 807-817,  
540 doi:10.1109/TIP.2015.2509249 (2016).
- 541 15 Mitchison, J. M. & Nurse, P. Growth in cell length in the fission yeast *Schizosaccharomyces*  
542 *pombe*. *J Cell Sci* **75**, 357-376 (1985).

- 543 16 Rappaz, B. *et al.* Noninvasive characterization of the fission yeast cell cycle by monitoring  
544 dry mass with digital holographic microscopy. *J Biomed Opt* **14**, 034049,  
545 doi:10.1117/1.3147385 (2009).
- 546 17 Atilgan, E., Magidson, V., Khodjakov, A. & Chang, F. Morphogenesis of the Fission Yeast Cell  
547 through Cell Wall Expansion. *Curr Biol* **25**, 2150-2157, doi:10.1016/j.cub.2015.06.059  
548 (2015).
- 549 18 Simanis, V. Pombe's thirteen – control of fission yeast cell division by the septation  
550 initiation network. *Journal of Cell Science* **128**, 1465, doi:10.1242/jcs.094821 (2015).
- 551 19 Ray, S. *et al.* The mitosis-to-interphase transition is coordinated by cross talk between the  
552 SIN and MOR pathways in *Schizosaccharomyces pombe*. *Journal of Cell Biology* **190**, 793-  
553 805, doi:10.1083/jcb.201002055 (2010).
- 554 20 Martin, S. G. & Arkowitz, R. A. Cell polarization in budding and fission yeasts. *FEMS*  
555 *Microbiology Reviews* **38**, 228-253, doi:10.1111/1574-6976.12055 (2014).
- 556 21 Nurse, P., Thuriaux, P. & Nasmyth, K. Genetic control of the cell division cycle in the fission  
557 yeast *Schizosaccharomyces pombe*. *Molecular and General Genetics MGG* **146**, 167-178,  
558 doi:10.1007/BF00268085 (1976).
- 559 22 Hagan, I. & Yanagida, M. Novel potential mitotic motor protein encoded by the fission  
560 yeast *cut7+* gene. *Nature* **347**, 563-566, doi:10.1038/347563a0 (1990).
- 561 23 Minet, M., Nurse, P., Thuriaux, P. & Mitchison, J. M. Uncontrolled septation in a cell division  
562 cycle mutant of the fission yeast *Schizosaccharomyces pombe*. *J Bacteriol* **137**, 440-446,  
563 doi:10.1128/JB.137.1.440-446.1979 (1979).
- 564 24 Pan, K. Z., Saunders, T. E., Flor-Parra, I., Howard, M. & Chang, F. Cortical regulation of cell  
565 size by a sizer *cdr2p*. *eLife* **3**, e02040, doi:10.7554/eLife.02040 (2014).
- 566 25 Mutavchiev, D. R., Leda, M. & Sawin, K. E. Remodeling of the Fission Yeast Cdc42 Cell-  
567 Polarity Module via the Sty1 p38 Stress-Activated Protein Kinase Pathway. *Current*  
568 *biology : CB* **26**, 2921-2928, doi:10.1016/j.cub.2016.08.048 (2016).
- 569 26 Muñoz, J. *et al.* Extracellular cell wall  $\beta(1,3)$ glucan is required to couple septation to  
570 actomyosin ring contraction. *The Journal of cell biology* **203**, 265-282,  
571 doi:10.1083/jcb.201304132 (2013).
- 572 27 Berlin, A., Paoletti, A. & Chang, F. Mid2p stabilizes septin rings during cytokinesis in  
573 fission yeast. *J Cell Biol* **160**, 1083-1092, doi:10.1083/jcb.200212016 (2003).
- 574 28 Bryan, A. K., Goranov, A., Amon, A. & Manalis, S. R. Measurement of mass, density, and  
575 volume during the cell cycle of yeast. *Proc Natl Acad Sci U S A* **107**, 999-1004,  
576 doi:10.1073/pnas.0901851107 (2010).
- 577 29 Mitchison, J. M. The growth of single cells. I. *Schizosaccharomyces pombe*. *Exp Cell Res* **13**,  
578 244-262, doi:10.1016/0014-4827(57)90005-8 (1957).
- 579 30 Stonyte, V., Boye, E. & Grallert, B. Regulation of global translation during the cell cycle. *J*  
580 *Cell Sci* **131**, doi:10.1242/jcs.220327 (2018).
- 581 31 Godin, M. *et al.* Using buoyant mass to measure the growth of single cells. *Nat Methods* **7**,  
582 387-390, doi:10.1038/nmeth.1452 (2010).



- 583 32 Liu, X., Oh, S., Peshkin, L. & Kirschner, M. W. Computationally Enhanced Quantitative  
584 Phase Microscopy Reveals Autonomous Oscillations in Mammalian Cell Growth. *bioRxiv*,  
585 631119, doi:10.1101/631119 (2019).
- 586 33 Miettinen, T. P., Kang, J. H., Yang, L. F. & Manalis, S. R. Mammalian cell growth dynamics in  
587 mitosis. *Elife* **8**, doi:10.7554/eLife.44700 (2019).
- 588 34 Oldewurtel, E. R., Kitahara, Y., Cordier, B., Özbaykal, G. & van Teeffelen, S. Bacteria control  
589 cell volume by coupling cell-surface expansion to dry-mass growth. *bioRxiv*, 769786,  
590 doi:10.1101/769786 (2019).
- 591 35 Harding, C. V. & Feldherr, C. Semipermeability of the nuclear membrane in the intact cell. *J*  
592 *Gen Physiol* **42**, 1155-1165, doi:10.1085/jgp.42.6.1155 (1959).
- 593 36 Edelstein, A. D. *et al.* Advanced methods of microscope control using  $\mu$ Manager software. *J*  
594 *Biol Methods* **1**, doi:10.14440/jbm.2014.36 (2014).
- 595 37 Ursell, T. *et al.* Rapid, precise quantification of bacterial cellular dimensions across a  
596 genomic-scale knockout library. *BMC Biol* **15**, 17, doi:10.1186/s12915-017-0348-8  
597 (2017).
- 598 38 Grover, W. H. *et al.* Measuring single-cell density. *Proc Natl Acad Sci U S A* **108**, 10992-  
599 10996, doi:10.1073/pnas.1104651108 (2011).
- 600 39 Kang, J. H. *et al.* Noninvasive monitoring of single-cell mechanics by acoustic scattering.  
601 *Nat Methods* **16**, 263-269, doi:10.1038/s41592-019-0326-x (2019).
- 602
- 603

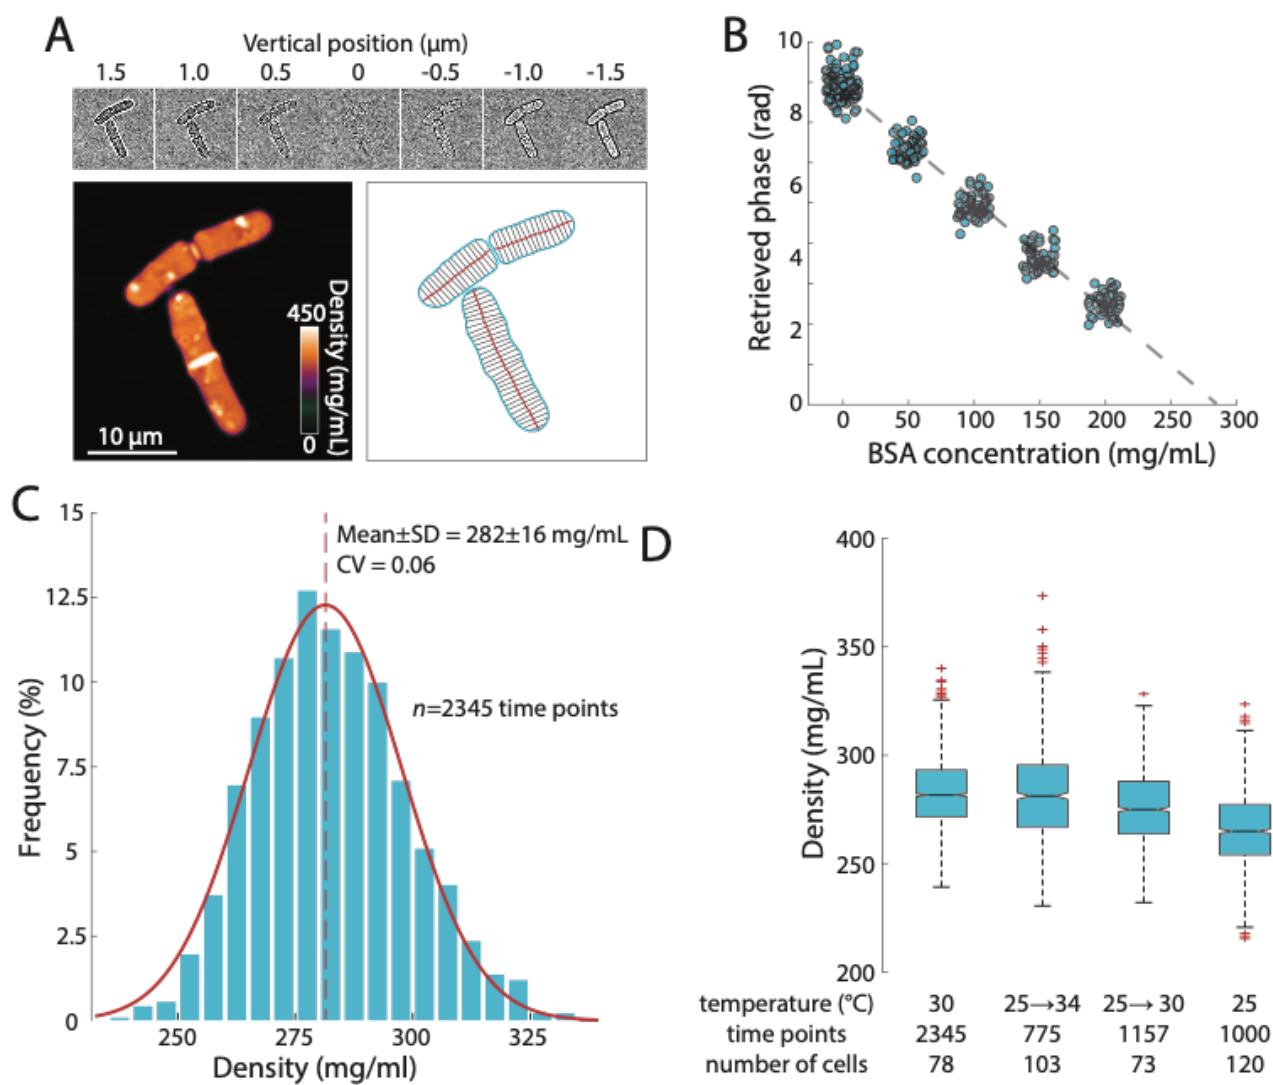

604

605 **Figure 1: Precise measurement of intracellular density using quantitative phase imaging**  
 606 **(QPI) based on a z-stack of brightfield images.**

- 607 A) QPI method for computing cytoplasmic density from brightfield images. A z-stack of  
 608 brightfield images of fission yeast cells  $\pm 1.5 \mu\text{m}$  around the focal position (top) were  
 609 computationally analyzed by solving the transport-of-intensity equation to retrieve pixel-  
 610 by-pixel phase-shift maps (bottom left). Cellular dimensions were determined via  
 611 segmentation and skeletonization (bottom right).
- 612 B) QPI phase shifts were calibrated by imaging cells in medium supplemented with a range  
 613 of concentrations of BSA. The retrieved phase shift is linearly related to concentration.
- 614 C) Histogram of dry-mass density measurements of exponential-phase fission yeast cells  
 615 grown at  $30^{\circ}\text{C}$  in YE5S medium. A Gaussian fit (red) yielded a mean density of  $282 \pm 16$   
 616 mg/mL ( $n=2345$  time points, 78 cells).
- 617 D) Average cell density varied by less than 10% across different temperatures and  
 618 temperature shifts.

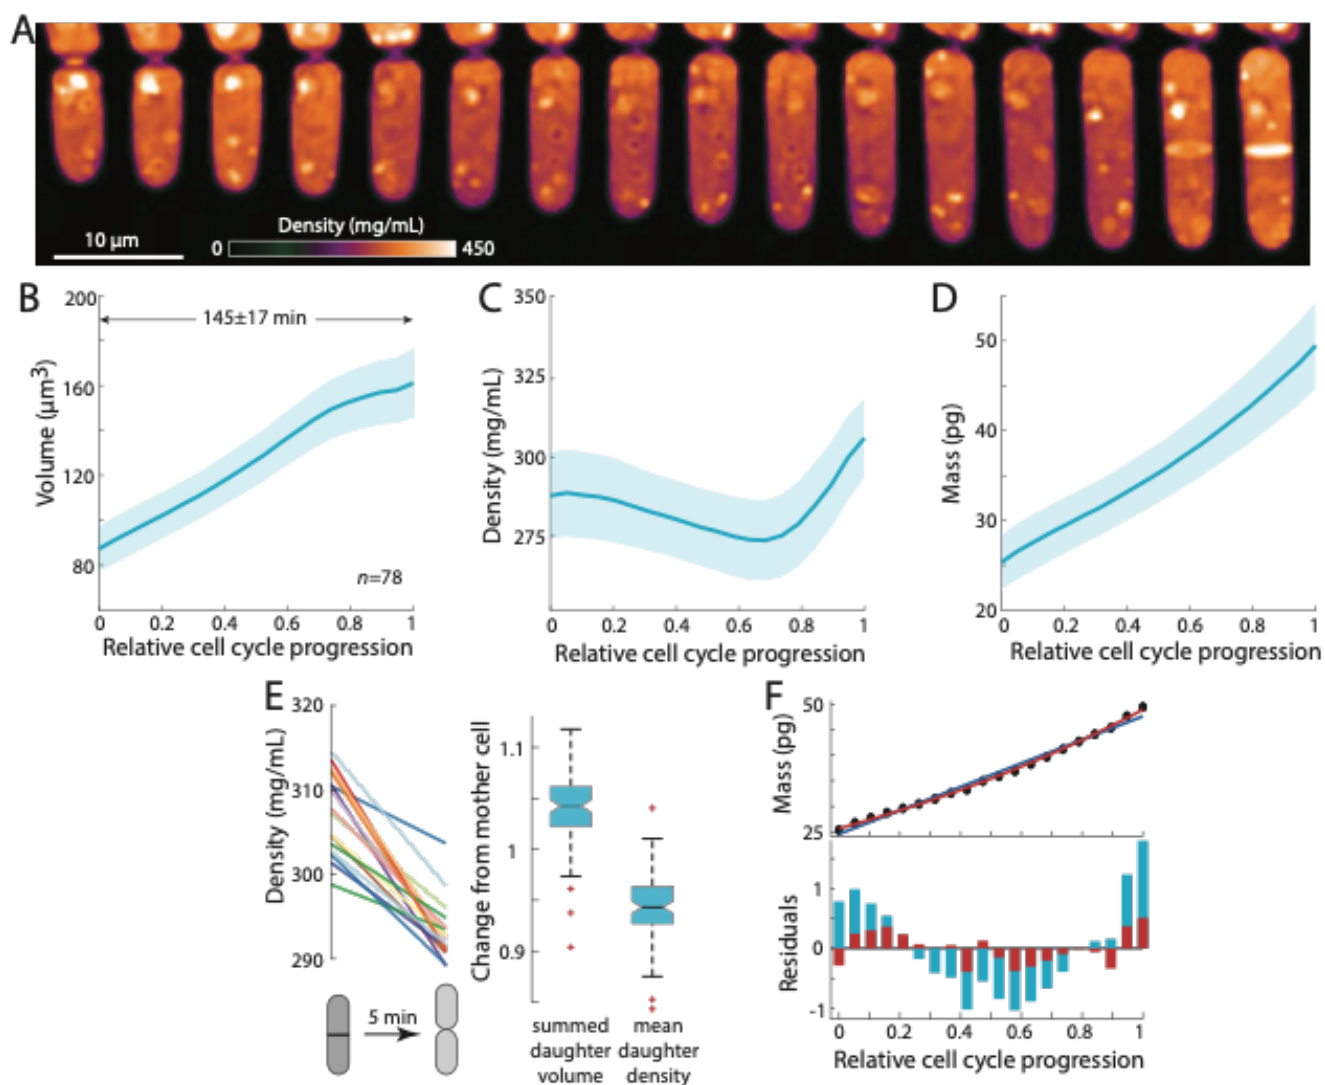

619

620

621

622

623

624

625

626

627

628

629

630

631

632

## Figure 2: Intracellular density varies across the cell cycle.

- A) Wild-type fission yeast cells in exponential phase were imaged in time lapse in a microfluidic chamber and phase-shift maps were extracted by QPI. Shown are images of a representative cell traversing the cell cycle from cell birth to septation (10 min/frame).
- B-D) Cell volume (B), density (C), and dry mass (D) of cells aligned by their relative progression in the cell cycle. Curves are mean values and shaded regions represent 1 standard deviation (SD) ( $n=78$  cells). Mass was estimated from volume and density measurements.
- E) Cell density decreases upon cell separation. During the 5 min directly after cell separation, the summed volume of the daughter cells increased by  $\sim 5\%$  while the average density of the daughter cells decreased by  $\sim 5\%$ .
- F) Dry mass grows exponentially. The residuals of an exponential fit (red) to mass growth were much smaller than a linear fit (blue).

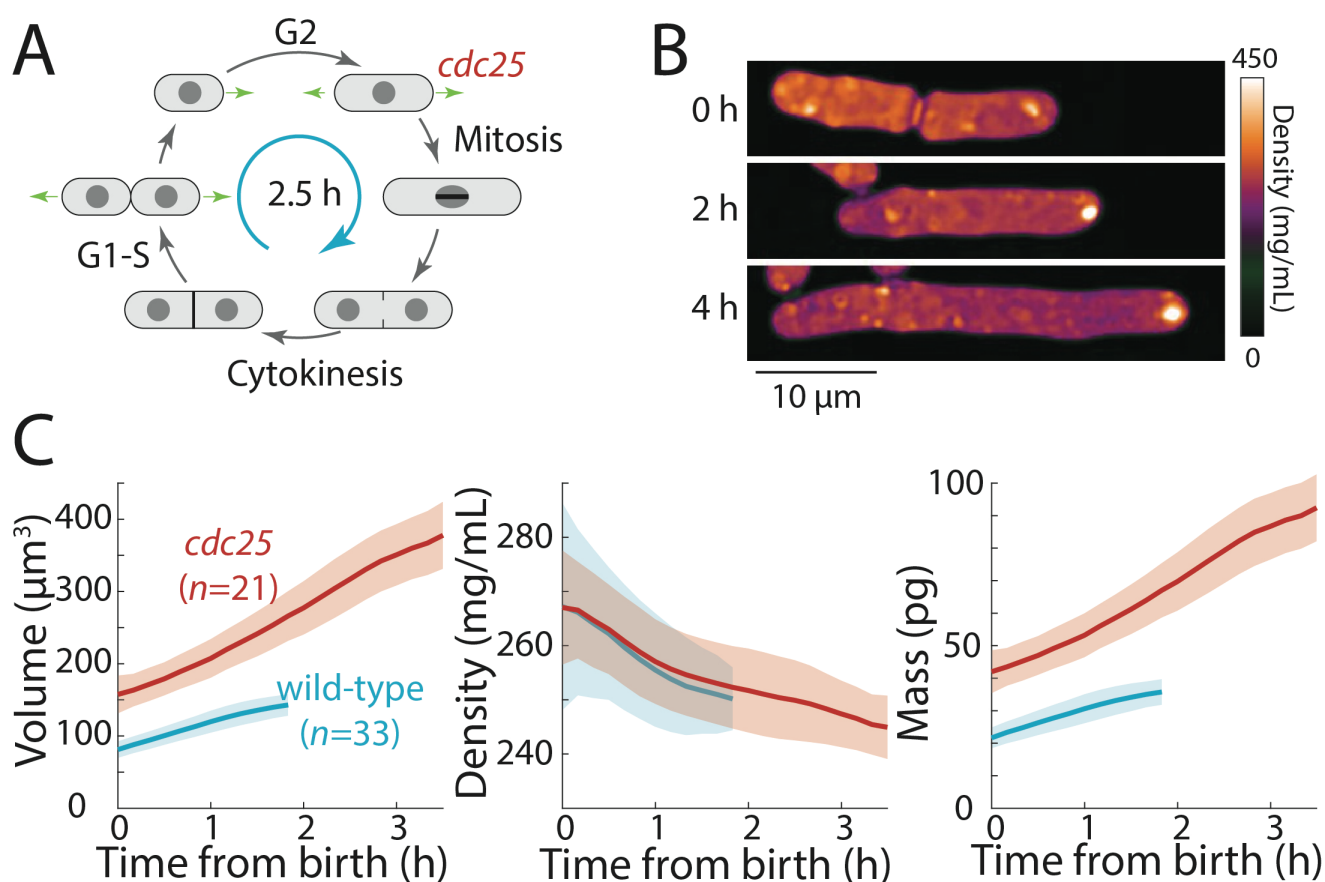

633

634 **Figure 3: Extension of G2-phase cell cycle stage results in cell elongation and decreased**  
635 **intracellular density.**

- 636 A) Schematic of fission yeast cell cycle, highlighting the point at which a *cdc25* temperature-  
637 sensitive mutant was to delay progression to mitosis.
- 638 B) *cdc25-22* cells were shifted from the permissive temperature 25 °C to the semi-permissive  
639 temperature 32 °C to extend G2 phase, leading to continued cell elongation. QPI images of  
640 a representative cell are shown.
- 641 C) Volume (left), density (middle), and dry mass (right) measurements of *cdc25-22* cells that  
642 grew at least 2.5-fold relative to their birth length before dividing, compared with wild-  
643 type cells under same conditions. Measurements are aligned from cell birth until  
644 elongation rate decreased to 20 nm/min (as an indication of the transition to mitosis).

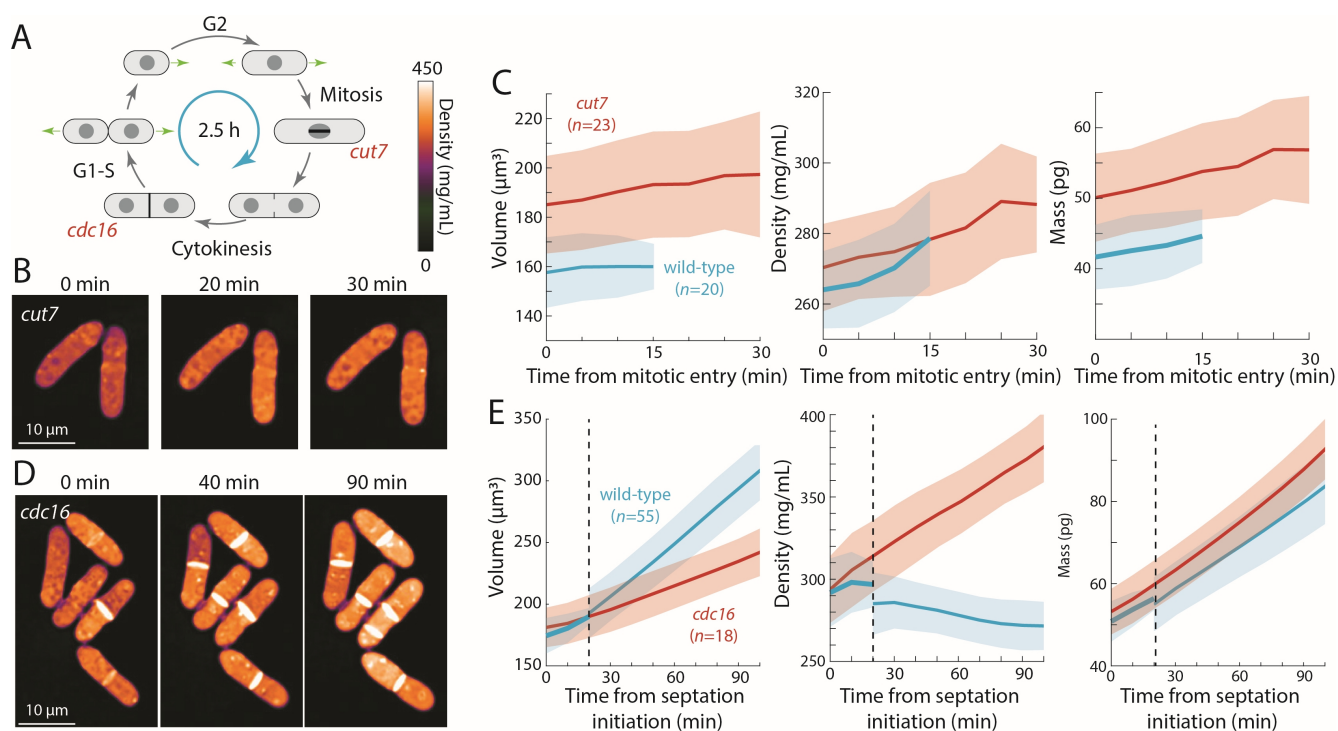

645

646 **Figure 4: Cell cycle arrests in mitosis and cytokinesis result in increased intracellular**  
 647 **density.**

- 648 A) Schematic indicating stages of cell cycle blocks induced by temperature-sensitive mutants  
 649 *cut7-446* (spindle kinesin-5) and *cdc16-116*.  
 650 B) *cut7-446* cells were shifted from 25 °C to 30 °C to delay mitotic progression. QPI images of  
 651 two representative cells delayed in mitosis for ~20 min until the onset of septation (30  
 652 min time point).  
 653 C) Volume (left), density (middle), and dry mass (right) measurements of *cut7-446* cells from  
 654 mitotic entry ( $t=0$ ) through initiation of septum formation at cytokinesis. Density  
 655 continued to increase during mitotic arrest.  
 656 D) *cdc16-116* cells were shifted from 25 °C to 34 °C to arrest cells in cytokinesis. QPI images  
 657 of five representative cells are shown. *cdc16* cells generally did not complete cell  
 658 separation and often assembled additional septa without elongating.  
 659 E) Volume (left), density (middle), and dry mass (right) measurements of *cdc16-116* cells  
 660 from initiation of the first septum ( $t=0$ ). Wild-type cells separated after ~20 min (dashed  
 661 line), and thereafter the behavior of the daughter cells was tracked for comparison with  
 662 *cdc16* cells (volume and dry mass were summed for the two daughter cells). Density  
 663 increased during cytokinetic arrest.

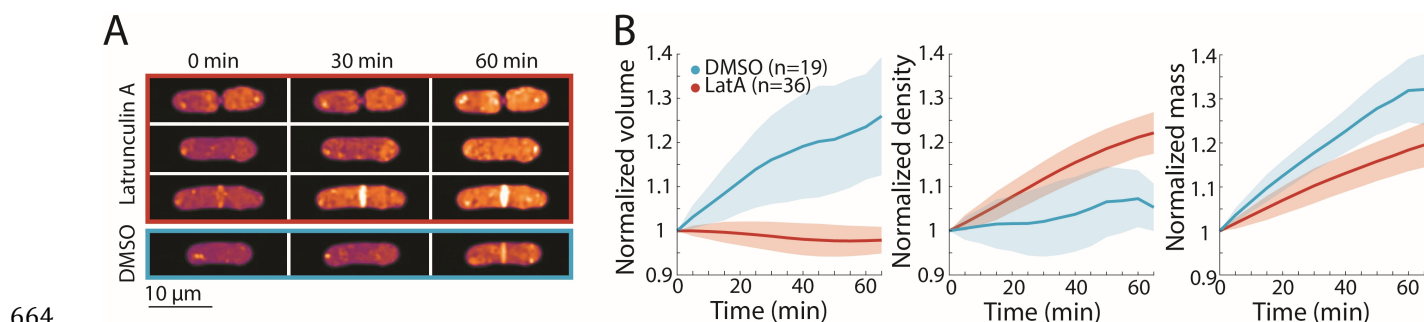

665 **Figure 5: Cell cycle-independent growth inhibition by Latrunculin A results in increased**  
666 **intracellular density.**

- 667 A) Latrunculin A inhibited cell growth and cell cycle progression regardless of cell-cycle  
668 stage. Representative images of wild-type cells treated with 0.2 mM latrunculin A at  
669 different cell cycle stages (shortly after division, during interphase, and during  
670 cytokinesis), each at 0, 30, or 60 min after the start of treatment. As a control (bottom),  
671 cells were treated with the equivalent amount of DMSO (1 μL/100 μL YE+agarose);  
672 growth continued and density remained relatively constant.
- 673 B) Volume (left), density (middle), and dry mass (right) measurements of latrunculin A-  
674 treated wild-type cells from the start of treatment ( $t=0$ ). Growth halted and density  
675 increased due to continued mass synthesis during treatment.

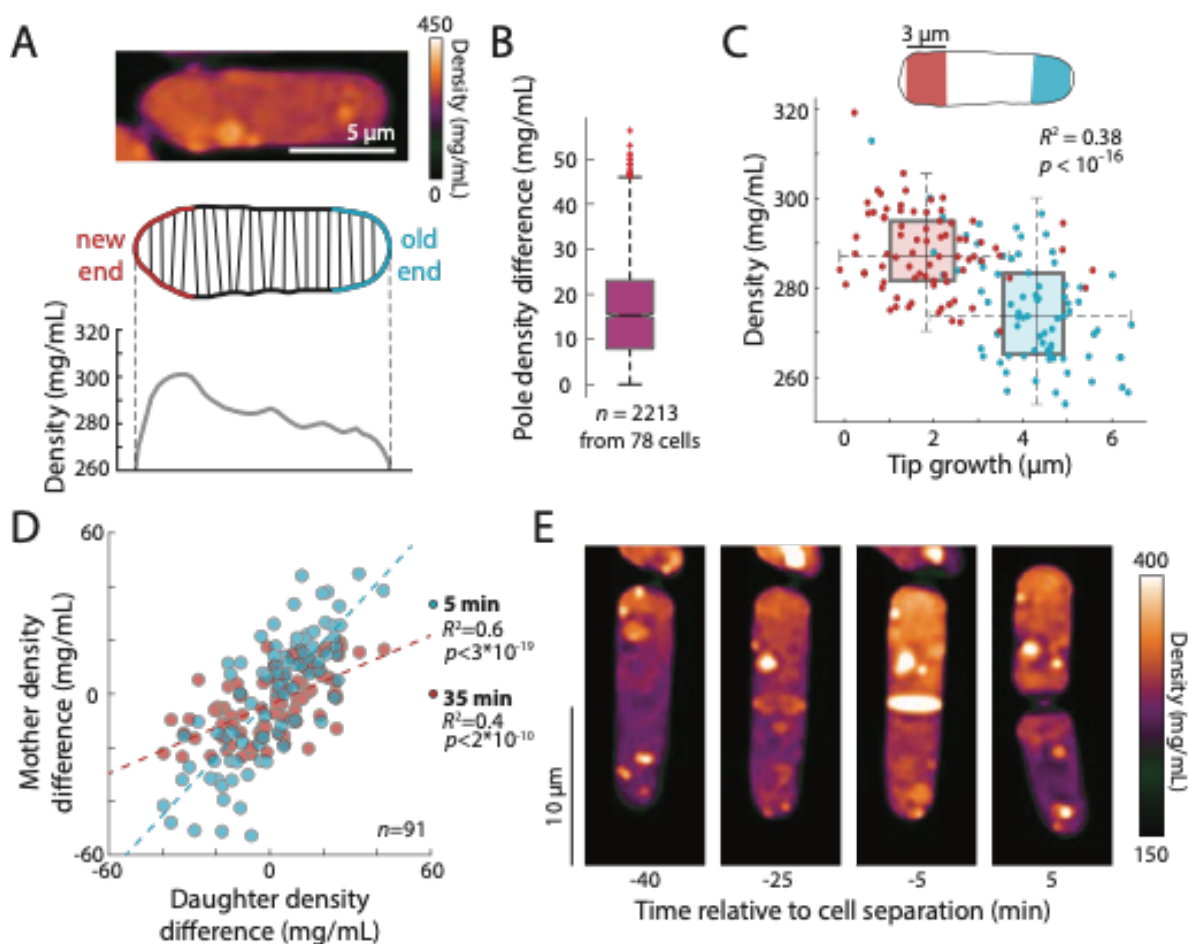

676

677

**Figure 6: An intracellular density gradient negatively correlates with tip growth.**

678

A) Top: QPI image of a representative cell displaying an intracellular gradient of density.

679

Middle: density was measured in slices perpendicular to the long axis. Bottom: the new end (non- or slowly growing) exhibited a higher density than the old (growing) end.

681

B) Density was substantially different between the new and old ends in many cells. Time-

682

lapse QPI images were used to measure the densities in regions within 3  $\mu\text{m}$  of each cell end. Shown is the density difference between the cell poles averaged over the cell cycle.

683

Box extends from 25<sup>th</sup> to 75<sup>th</sup> percentile, with the median as a horizontal bar. Whiskers indicate extreme points not considered outliers ( $n=78$  cells).

685

C) Old ends grew more and exhibited lower mean densities over the course of the cell cycle

687

than new ends.

688

D) Correlation between the density difference of daughter cells and the corresponding halves

689

of the mother cell at 5 min (blue) or 35 min (red) before cell division. The halves of the mother cell exhibited larger density differences at the later time point, consistent with the

690

density differences between daughter cells.

691

E) QPI images of a representative cell at interphase, start of septum formation, late in

692

septum formation, and after cell division. The gradient in the interphase cell was

693

maintained over time and passed on to the daughter cells.

694

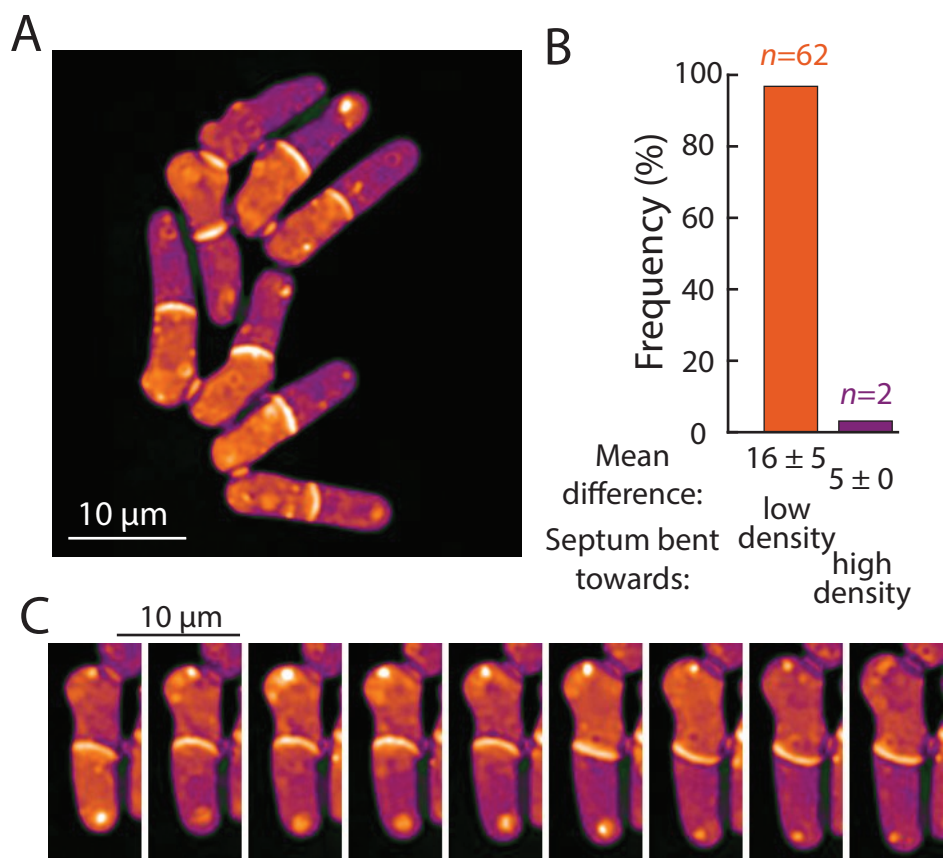

695

696 **Figure 7: Bending of the septum reveals a correlation between intracellular density and**  
697 **osmotic pressure.**

- 698 A) Representative image showing bent septa and density differences between the two  
699 daughter-cell compartments after cytokinesis.
- 700 B) In 62 of 64 cells with a bent septum at the time point of maximum density difference  
701 between daughter-cell compartments, the septum was bent away from the higher-density  
702 compartment, with a higher density difference than in the 2 cells in which the septum was  
703 bent toward the higher-density compartment.
- 704 C) An example cell in which the direction of septal bending and the sign of the density  
705 difference between daughter-cell compartments fluctuated over time (5 min/frame).  
706 After the bottom compartment decreased and the top compartment increased in density,  
707 the septum bent in the opposite direction, consistent with the correlation between  
708 bending and density difference in (B).



709 **Supplemental Table**

710

711 **Table S1: *S. pombe* strains used in this study.**

|                                                     |        |
|-----------------------------------------------------|--------|
| <i>h</i> - wild-type (972)                          | FC15   |
| <i>h</i> - <i>cdc25-22</i>                          | FC342  |
| <i>h</i> - <i>cut7-446 leu1-32</i>                  | FC1455 |
| <i>h</i> - <i>cdc16-116</i>                         | FC13   |
| <i>h</i> - <i>mid2::kanMX ade6 leu1-32 ura4-D18</i> | FC881  |

712

713 **Supplemental Figures**

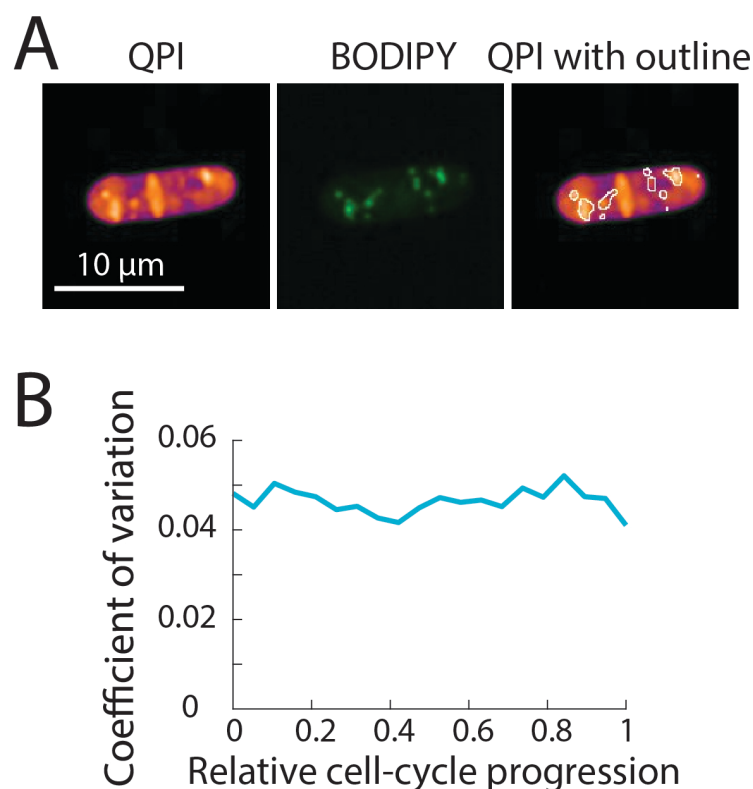

714

715 **Supplemental Figure 1: High-density features in QPI images co-localize with lipid droplets.**

716 A) QPI image (left) and corresponding fluorescence image of a representative BODIPY-  
717 stained wild-type cell (middle). The fluorescence intensity image was thresholded to  
718 identify regions containing lipid droplets, which overlapped with high-density regions of  
719 the QPI image (right).

720 B) Coefficient of variation (CV) of intracellular density over the cell cycle. The CV at each  
721 specific stage of cell-cycle progression (<5%) was slightly lower compared with the CV  
722 across an entire cell population (6%, Figure 1C), supporting the notion that some  
723 population-wide variation arises from cell-cycle dependent density variations.

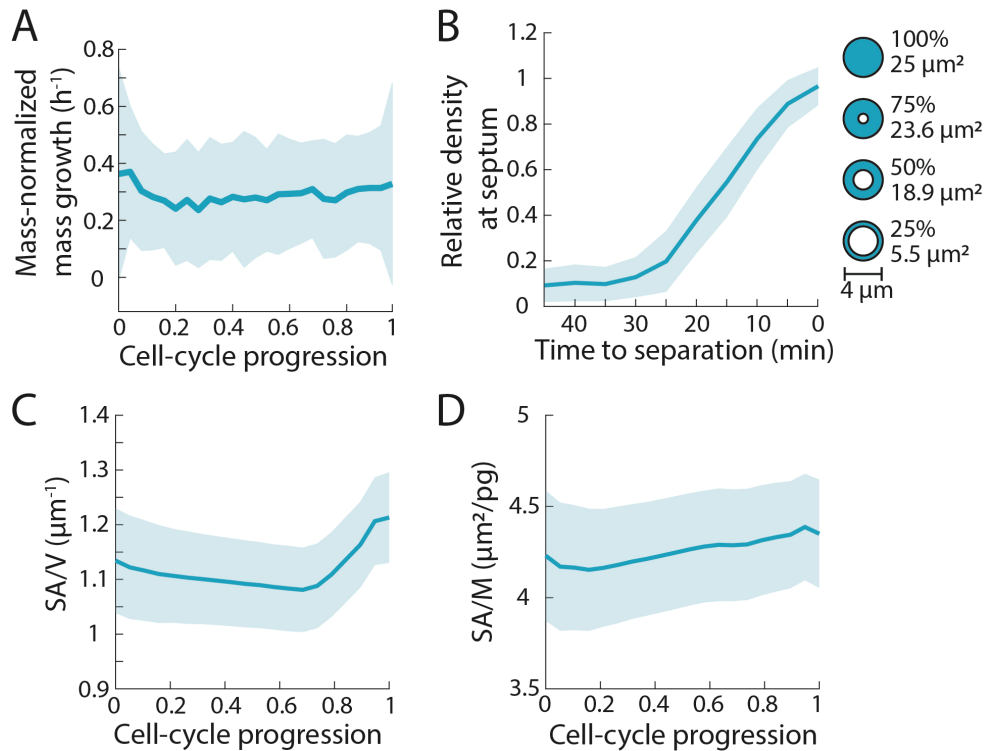

724

725 **Supplemental Figure 2: Surface area to mass ratio varies less than dry-mass density**  
726 **during the cell cycle.**

- 727 A) Mass growth normalized by cell mass ( $1/M dM/dt$ ) remained relatively constant  
728 throughout the cell cycle; larger cells added more mass per unit time, a characteristic of  
729 exponential mass growth.
- 730 B) An estimate of septum growth by measurement of density at the septal region prior to  
731 division. The area of the septum was calculated by assuming a double-layered structure  
732 with a diameter of  $4 \mu m$ . The intensity was used to estimate the diameter of the opening,  
733 such that at 50% intensity, 50% of the cross-sectional diameter was assumed to be filled.
- 734 C) Surface area to volume (SA/V) ratio increased at the end of the cell cycle, as volume  
735 growth slowed down and surface area increased due to septum formation.
- 736 D) Surface area to mass (SA/M) ratio varied by only  $\sim 5\%$ .

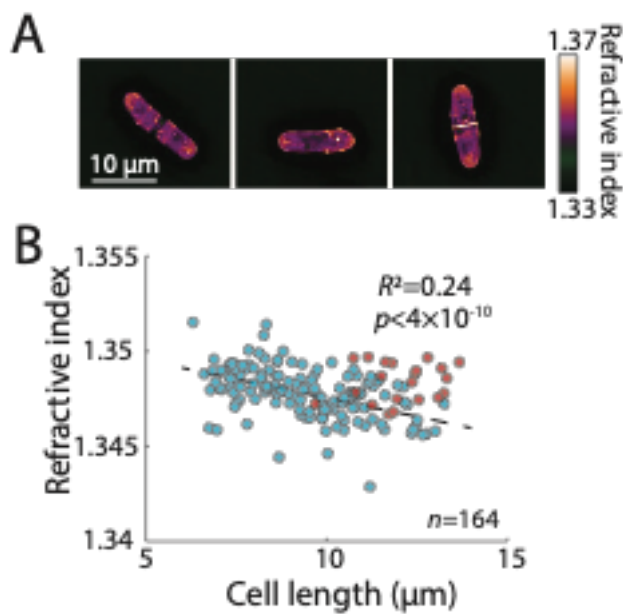

737

738

739

740

741

742

743

744

**Supplemental Figure 3: Refractive index measurements based on holography show cell cycle-dependent density variation.**

- A) Representative holographic images of cells at an early, middle, and late stage in the cell cycle.
- B) The mean refractive index was calculated from holographic images of non-septated cells (blue) and septated cells (red). The negative correlation for non-septated cells (dashed line) indicates that refractive index decreases with increasing cell length.

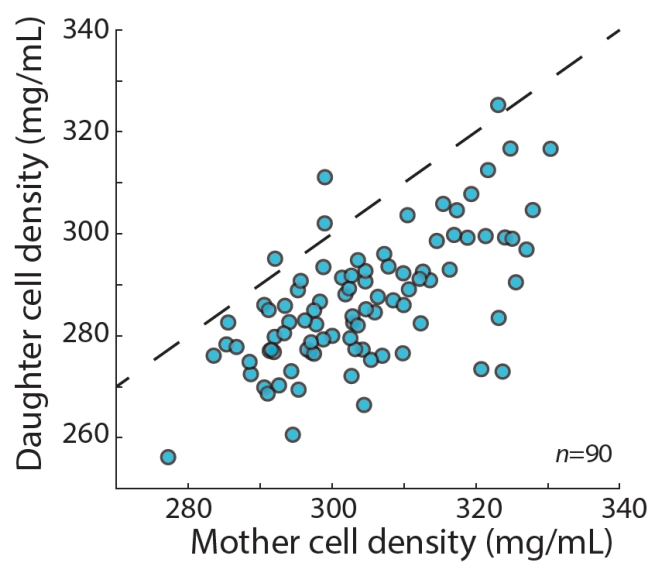

745

746 **Supplemental Figure 4: The mean density of daughter cells was typically lower than that**  
747 **of the mother cell.**

748 Mean density of mother cell and daughter cells were measured from consecutive images (5 min  
749 apart) directly before and after cell division, respectively. The daughter cell densities were then  
750 averaged.

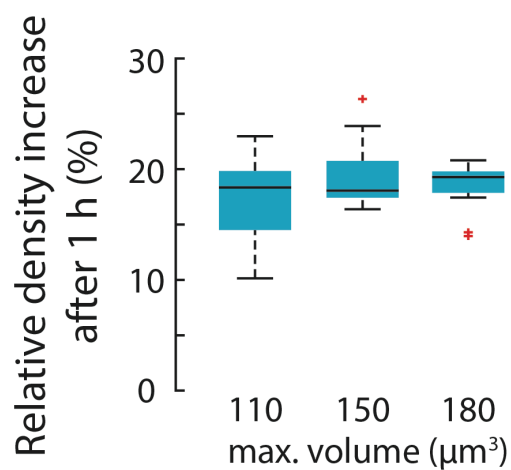

751

752 **Supplemental Figure 5: The increase in intracellular density due to treatment with the**  
753 **actin inhibitor latrunculin A was not dependent on cell size.**

754 Cells were treated for 1 h with 0.2 mM latrunculin A as described in Figure 6. Relative density  
755 increases per cell were plotted according to cell size. (Cells per bin: 10, 10, 12).

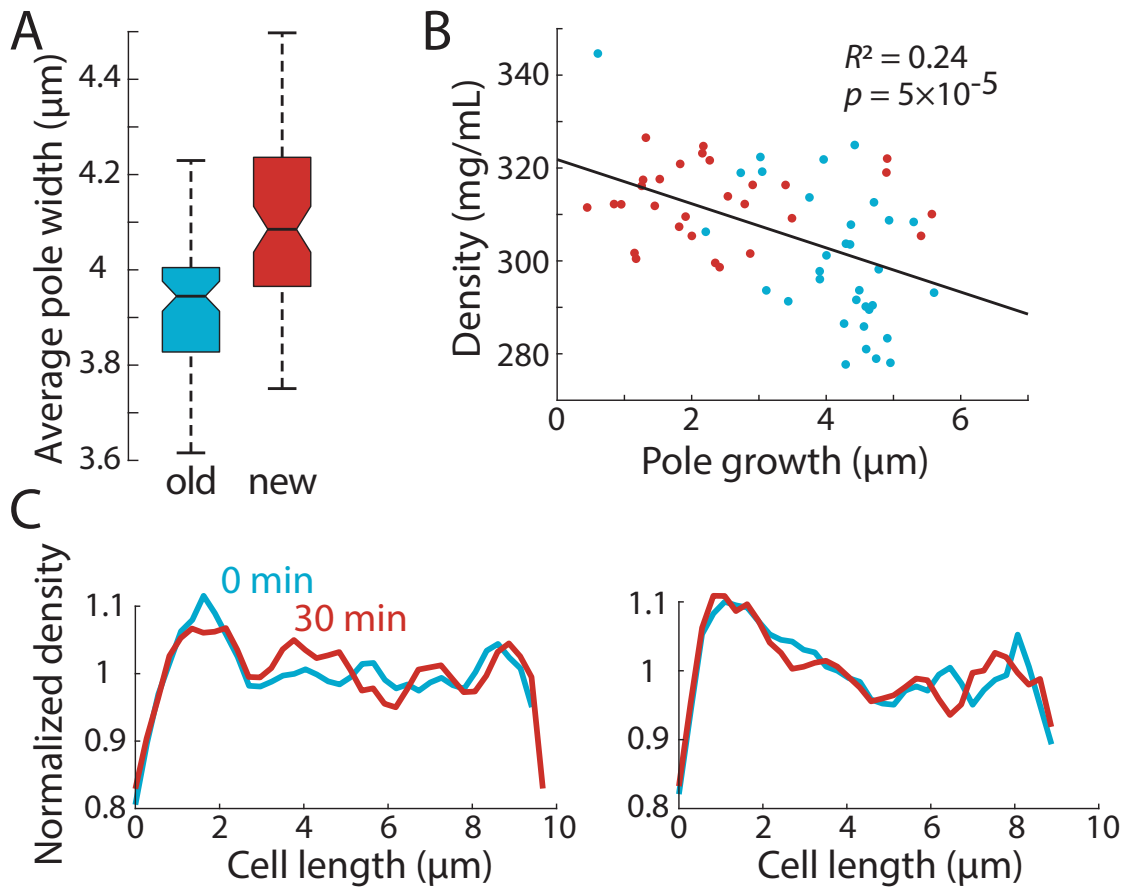

756

757 **Supplemental Figure 6: Spatial intracellular density gradients in cells with similar widths,**  
758 **and in cells treated with Latrunculin A.**

- 759 A) The mean width of the region between 1.5-3  $\mu\text{m}$  away from the cell pole was extracted for  
760 the new and old pole over time and averaged. The average old pole width was  $\sim 0.15 \mu\text{m}$   
761 smaller than that of new poles.
- 762 B) To correct for potential height-related effects on intracellular density measurements, we  
763 constrained our measurements of average pole density to new and old poles with width  
764 between 3.9 and 4.1  $\mu\text{m}$  (corresponding to the medians in (A)). The negative correlation  
765 between pole growth and density observed in Figure 3C persisted, suggesting that the  
766 difference in measured density between poles is not an QPI artifact due to differences in  
767 sample height.
- 768 C) Stability of the density gradient in Latrunculin A-treated cells. Normalized density plots  
769 along the length of individual cells before and 30 min after treatment with Latrunculin A.  
770 The gradient-like distribution of density was maintained in these cells in the absence of F-  
771 actin and tip growth.

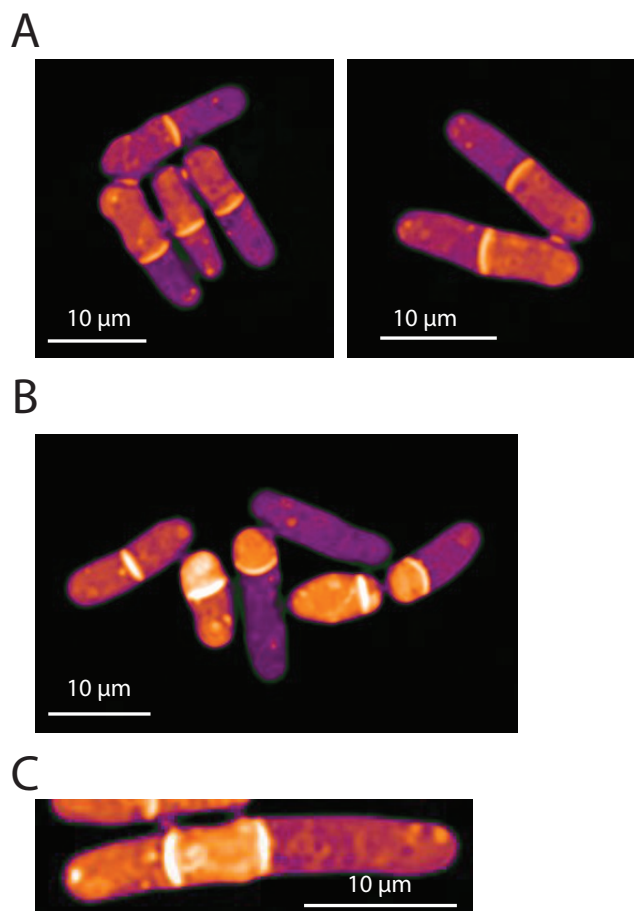

772

773 **Supplemental Figure 7: Septa bend away from the compartment of higher density in *mid2***  
774 **and *cdc16* mutant cells.**

- 775 A) *mid2* cells with bent septa typically exhibited differences in density between sister-cell  
776 compartments, and in each case the septum was bent away from the compartment of  
777 higher density.
- 778 B) In *cdc16* cells, the septum was often located to one side of the middle of the cell, resulting  
779 in a small, higher-density compartment that failed to grow and a larger compartment of  
780 lower density that exhibited tip growth prior to cytokinesis.
- 781 C) In multi-septated *mid2Δ* cells, internal compartments bounded by two septa exhibited  
782 higher density than the surrounding compartments; in these situations, both septa  
783 typically bent away from the higher-density compartment.
